# Supplementary material for: Melatonin alleviates chilling stress in cucumber seedlings by up-regulation of CsZat12 and modulation of polyamine and abscisic acid metabolism
Source: PubMed Central journal article supplement (PMC5504047; doi:10.1038/s41598-017-05267-3), 2017-07-10
Supplement: 41598_2017_5267_MOESM1_ESM.pdf [file 41598_2017_5267_MOESM1_ESM.pdf]

**Melatonin alleviates chilling stress in cucumber seedlings by up-regulation of *CsZat12* and modulation of polyamine and abscisic acid metabolism**

**Full name of author(s):** Hailiang Zhao <sup>1, 2, 3+\*</sup>, Kai Zhang<sup>1, 3+</sup>, Xiaoting Zhou <sup>1, 3+</sup>, Linjie Xi <sup>1, 3</sup>, Yuping Wang<sup>4</sup>, Hongjun Xu <sup>1, 3</sup>, Tonghua Pan <sup>1, 3</sup> and Zhirong Zou <sup>1, 3</sup>

**Institution of affiliation:** 1 College of Horticulture, Northwest Agricultural & Forest University, Yangling, Shaanxi, China, 2 College of Horticulture, Shanxi Agricultural & Forest University, Taigu, Shanxi, China 3 Key Laboratory of Protected Horticulture Engineering in Northwest, ministry of Agriculture, Yangling, Shaanxi, China, 4 Department of Garden Engineering, Gansu Agriculture Technology College, Lanzhou, Gansu, China.

+These authors contributed equally to this work.

\*Corresponding author:

Hailiang Zhao

Hailiang127627@126.com

Supporting Table 1. Sequence of primers used in quantitative real-time RT-PCR.

| Gene              | Accession NO. | Primer Sequence (5'-3')                                |
|-------------------|---------------|--------------------------------------------------------|
| <i>actin</i>      | Csa018882     | F: ATGGCCGATGCCGAGGATAT<br>R: TAGGAGCATCATCACCAGCAAAAC |
| <i>CsZat12</i>    | Csa5M180920.1 | F: TGCAATCGGCAGTTTTTCGTC<br>R: TCGTCTTCGGCTTAGTAGG     |
| <i>CsNCED1</i>    | Csa4M064690.1 | F: GGAAGTGGTGGTGATTGGGT<br>R: GTCGATTTCCCGTCCGTAA      |
| <i>CsNCED2</i>    | Csa7M428120.2 | F: CAAATCCGAAGTTTAGCCCAG<br>R: CATAATCCAGCAGACCAAGCG   |
| <i>CsCYP707A1</i> | Csa4M056600.1 | F: TCGATGCCGATTAACCTCCC<br>R: CCGCTTCGTTTCCCTTCTTG     |
| <i>CsCYP707A2</i> | Csa2M357280.1 | F: TCGGAGTTCTGTTTGCGGCT<br>R: TGGTAAAGGGCATAGTTCGT     |
